# Supplementary material
Source: ML conference proceedings conference paper supplement (https://openaccess.thecvf.com/content/ICCV2025/html/Sun_Uncertainty-Aware_Gradient_Stabilization_ICCV_2025_paper.html)
Supplement: Supplementary file 1 [file Sun_Uncertainty-Aware_Gradient_Stabilization_ICCV_2025_supplemental.pdf]

# Uncertainty-Aware Gradient Stabilization for Small Object Detection

## Supplementary Material

### 1. Hessian in Norm-based Localization

For the  $\mathcal{L}_2$  loss, we analyze the function's gradient and Hessian for center coordinate  $x$ :

$$\mathcal{L}_2(T_x, \hat{T}_x) = \left( \frac{x - \hat{x}}{w_a} \right)^2, \quad (1)$$

where  $w_a$  denotes the anchor width,  $x$  is the ground-truth coordinate, and  $\hat{x}$  the predicted coordinate. Note that normalized coordinates are defined as  $T_x = \frac{x - x_a}{w_a}$  and  $\hat{T}_x = \frac{\hat{x} - x_a}{w_a}$ , where  $x_a$  is the anchor's center. The gradient can be derived as:

$$\frac{\partial \mathcal{L}_2}{\partial \hat{T}_x} = 2(T_x - \hat{T}_x), \quad (2)$$

and the Hessian is derived as:

$$\mathbf{H}_x = \frac{\partial^2 \mathcal{L}_2}{\partial \hat{T}_x^2} = 2. \quad (3)$$

Mapping back to the original coordinates, the Hessian in terms of  $\hat{x}$  is:

$$\mathbf{H}_x = \frac{\partial^2 \mathcal{L}_2}{\partial \hat{x}^2} = \frac{2}{w_a^2} \quad (4)$$

This reveals  $K_x \propto 1/w_a^2$ , and smaller anchors result in growth in  $K$ , leading to steeper loss landscapes.

For size regression using  $\mathcal{L}_2$  loss on width  $w$ , the gradient with respect to  $\hat{w}$  is:

$$\frac{\partial \mathcal{L}_2}{\partial \hat{w}} = 2 \cdot \log\left(\frac{w}{\hat{w}}\right) \cdot \left(-\frac{1}{\hat{w}}\right). \quad (5)$$

The Hessian is derived as:

$$\mathbf{H}_w = \frac{\partial^2 \mathcal{L}_2}{\partial \hat{w}^2} = \underbrace{2 \cdot \frac{1}{\hat{w}^2}}_{\text{Term 1}} + \underbrace{2 \cdot \frac{1}{\hat{w}^2} \log \frac{w}{\hat{w}}}_{\text{Term 2}} \quad (6)$$

Term 2 vanishes as  $\hat{w} \rightarrow w$ , and the Hessian approximates  $\mathbf{H}_w = 2/\hat{w}^2$ , matching Eq. 4. This reveals that the loss curvature becomes steep when  $\hat{w}$  is small, potentially causing instability during optimization.

### 2. Hessian in IoU-based Localization

Following [1], we consider axis-aligned square boxes with ground truth center  $x$  and predicted center  $\hat{x}$ , the IoU loss is defined as:

$$\mathcal{L}_{\text{IoU}} = -\ln\left(\frac{I}{U}\right), \quad (7)$$

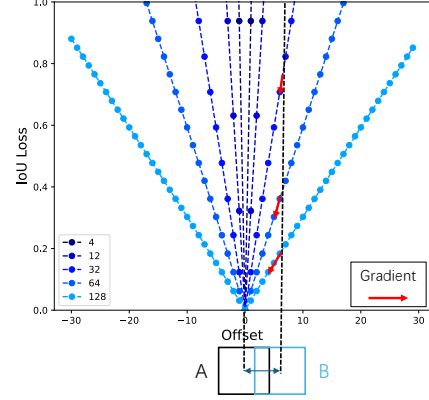

Figure 1. IoU loss and gradient magnitudes for different object sizes. Identical center shifts  $x$  produce larger gradients (red arrows) and sharper curvature for smaller boxes.

where  $I = \max(0, w - |x - \hat{x}|)$ ,  $U = 2w - I$ , and  $w$  is the box width. The gradient with respect to  $\hat{x}$  derives as:

$$\begin{aligned} \frac{\partial \mathcal{L}_{\text{IoU}}}{\partial \hat{x}} &= -\frac{1}{U} \frac{\partial I}{\partial \hat{x}} + \frac{I}{U^2} \frac{\partial U}{\partial \hat{x}} \\ &= -\left(\frac{1}{U} + \frac{I}{U^2}\right) \frac{\partial I}{\partial \hat{x}} \quad (\because \partial U / \partial \hat{x} = -\partial I / \partial \hat{x}) \end{aligned} \quad (8)$$

$$= \left(\frac{1}{w + d} + \frac{w - d}{(w + d)^2}\right) \text{sign}(x - \hat{x}), \quad d = |x - \hat{x}|. \quad (9)$$

The Hessian for overlapping boxes ( $|x - \hat{x}| < w$ ) becomes:

$$\frac{\partial^2 \mathcal{L}_{\text{IoU}}}{\partial \hat{x}^2} = \frac{4w}{(w^2 - d^2)^2}, \quad (10)$$

For small objects, both gradient and Hessian exhibit inverse scaling:

$$\frac{\partial \mathcal{L}_{\text{IoU}}}{\partial \hat{x}} \propto \frac{1}{w}, \quad \frac{\partial^2 \mathcal{L}_{\text{IoU}}}{\partial \hat{x}^2} \propto \frac{1}{w^3}. \quad (11)$$

This confirms that smaller objects exhibit larger gradients and sharper curvature. Fig. 1 shows that small objects suffer from disproportionately steep gradients despite equal positional errors.

### 3. Convergence Analysis

Fig. 2 shows mAP progression for UGS versus TPH-YOLOv5-x [2] on VisDrone. Under both (a) 640×640

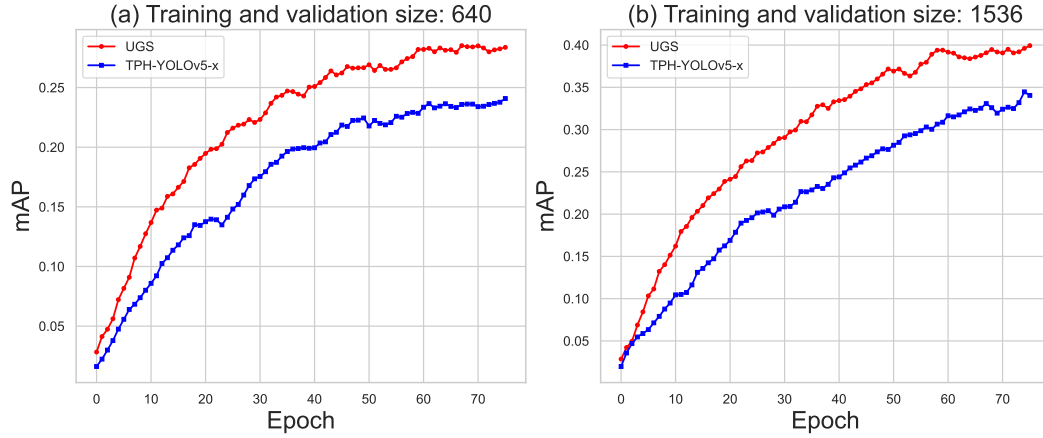

Figure 2. Comparison of training curves on VisDrone under two resolutions: (a)  $640 \times 640$  and (b)  $1536 \times 1536$ . UGS consistently outperforms TPH-YOLOv5-x [2] across all epochs, achieving faster convergence and higher final mAP.

and (b)  $1536 \times 1536$  resolutions, UGS achieves higher final mAP with faster convergence. For lower-resolution inputs (Fig. 2a), UGS surpasses the baseline by  $\sim 3\%$  mAP. For higher resolutions (Fig. 2b), it maintains a  $\sim 4\%$  mAP advantage, demonstrating stability across resolution.

## References

- [1] Chang Xu, Jinwang Wang, Wen Yang, and Lei Yu. Dot distance for tiny object detection in aerial images. In *CVPR*, pages 1192–1201, 2021. 1
- [2] Xingkui Zhu, Shuchang Lyu, Xu Wang, and Qi Zhao. Tph-yolov5: Improved yolov5 based on transformer prediction head for object detection on drone-captured scenarios. In *ICCV*, pages 2778–2788, 2021. 1, 2
